# Supplementary material
Source: publisher site journal article supplement (https://www.spandidos-publications.com/5070/downloadSupplementary)

Figure S1. Flow chart of the present study. COAD, colon adenocarcinoma; TCGA, the Cancer Genome Atlas; TMB, tumor mutation burden; MSI, microsatellite instability.

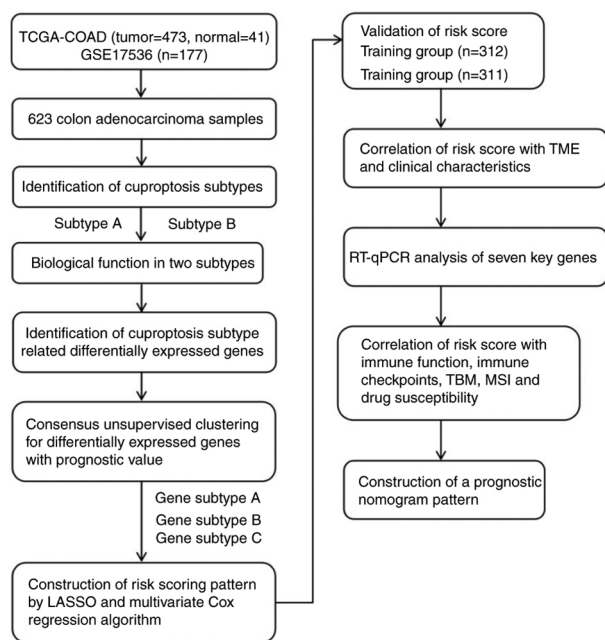

Figure S2. Correlations between risk score and all types of immune cells. (A) Plasma B cells, (B) resting NK cells, (C) activated memory CD4<sup>+</sup> T cells, (D) endothelial cells, (E) M0 macrophages (F) M1 macrophages, (G) M2 macrophages, (H) CD8<sup>+</sup> T cells and (I) T cell regulatory cells (Tregs).

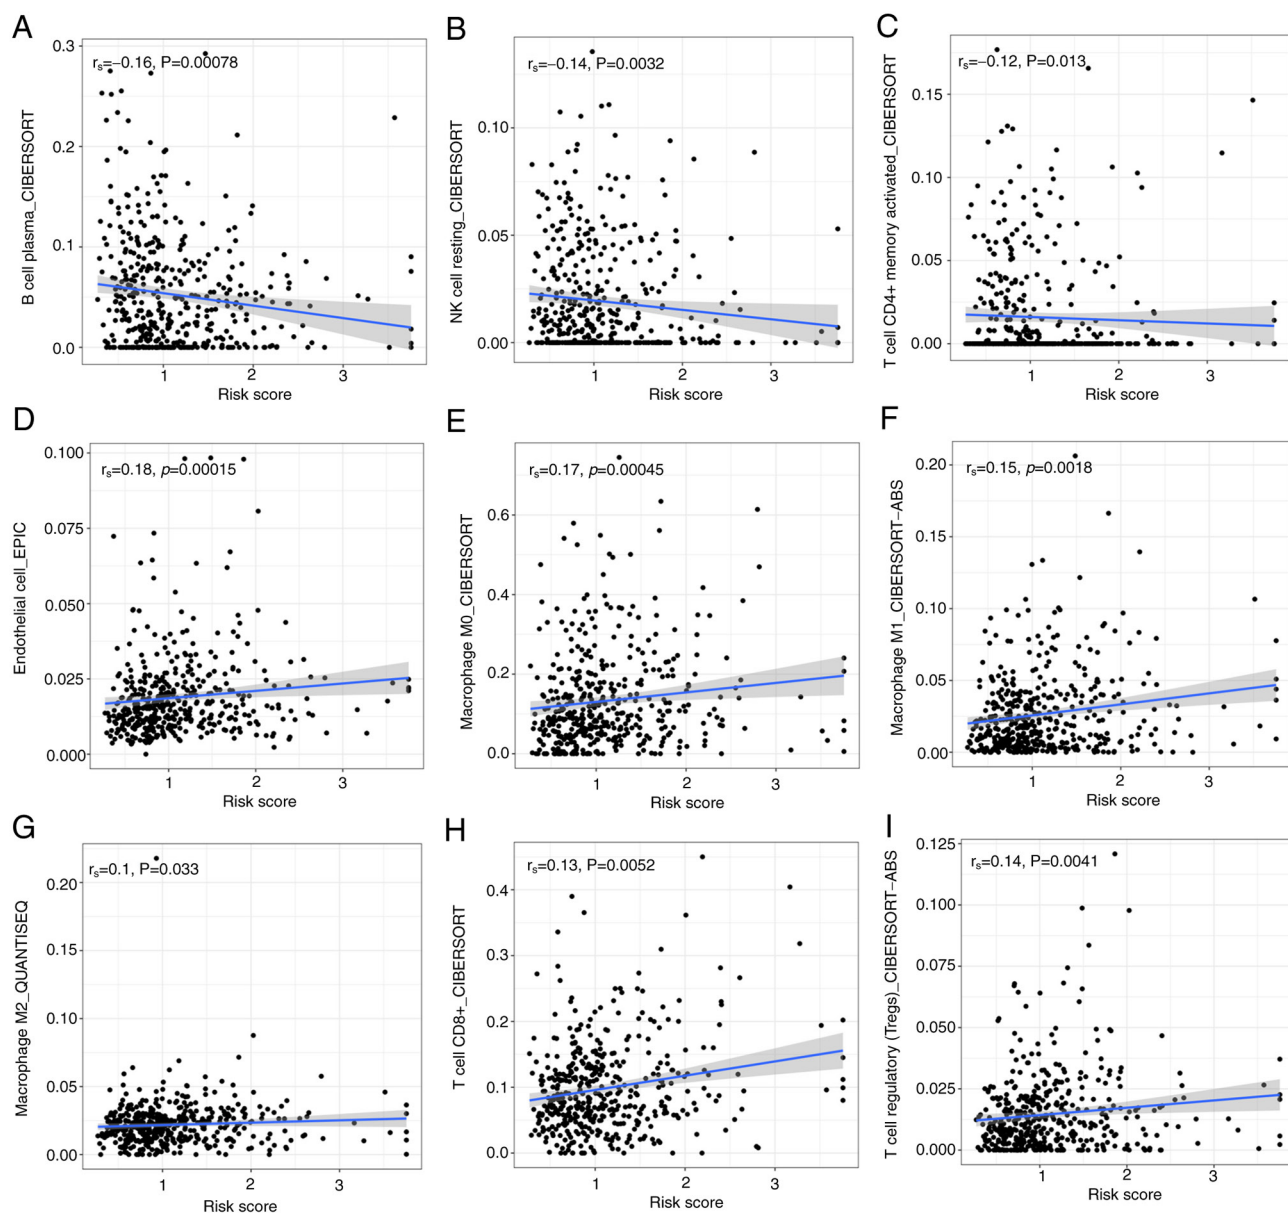

Figure S3. Clinical characteristics in high and low risk groups. (A) Age, (B) sex, (C) stage, (D) size of primary tumor, (E) distant metastasis and (F) lymph node stage. T, tumor; N, node; M, metastasis.

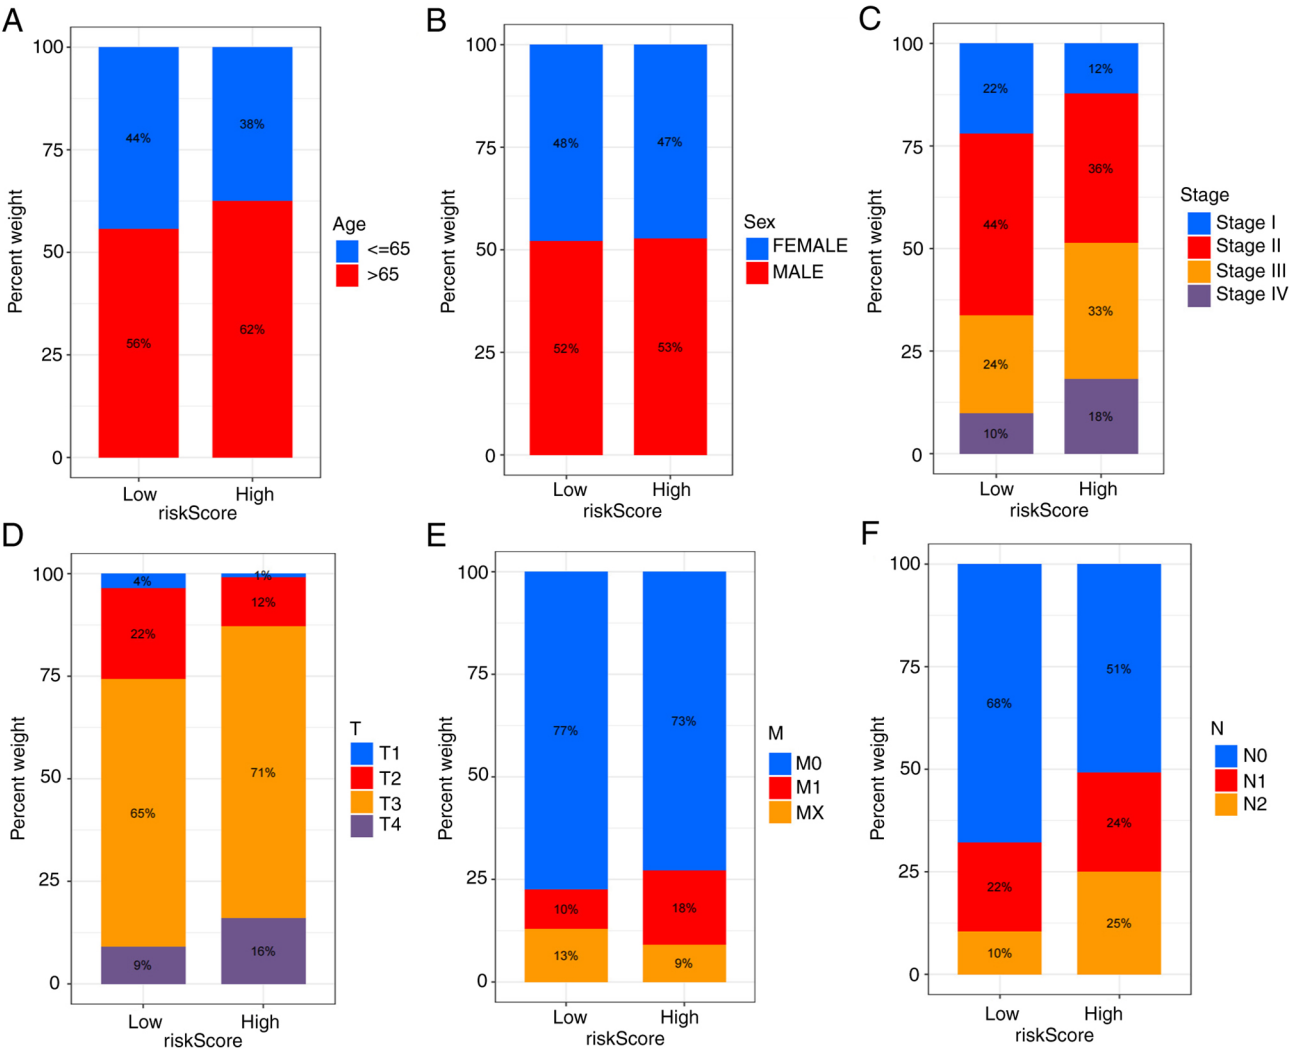

Supplement: Supplementary file 1 [file downloadSupplementary]
